# Supplementary material for: Saving sight in China and beyond: the Lifeline Express model
Source: PubMed Central journal article supplement — BMJ Glob Health. 2018 Aug 16;3(4):e000766. doi: 10.1136/bmjgh-2018-000766 (PMC6104791; doi:10.1136/bmjgh-2018-000766), 2018-08-16
Supplement: bmjgh-2018-000766supp001.pdf [file bmjgh-2018-000766supp001.pdf]

**Supplementary Table 1.** Diabetic retinopathy grading classification used based on the United Kingdom guidelines.<sup>1</sup>

| Retinopathy Grade |    | Description       | Features                                                                                                                                                                                                                                                                                                                                                                                                              |
|-------------------|----|-------------------|-----------------------------------------------------------------------------------------------------------------------------------------------------------------------------------------------------------------------------------------------------------------------------------------------------------------------------------------------------------------------------------------------------------------------|
| Retinopathy       | R0 | None              | <ul style="list-style-type: none"> <li>• Normal fundus</li> </ul>                                                                                                                                                                                                                                                                                                                                                     |
|                   | R1 | Background        | <ul style="list-style-type: none"> <li>• Microaneurysms</li> <li>• Retinal hemorrhage and/or exudates</li> </ul>                                                                                                                                                                                                                                                                                                      |
|                   | R2 | Pre-proliferative | <ul style="list-style-type: none"> <li>• Venous beading</li> <li>• Venous loops or reduplication</li> <li>• Intra-retinal microvascular abnormality (IRMA)</li> <li>• Multiple deep, round or blot hemorrhage</li> <li>• Cotton wool spots in addition to the above</li> </ul>                                                                                                                                        |
|                   | R3 | Proliferative     | <ul style="list-style-type: none"> <li>• New vessel at the disc (NVD)</li> <li>• New vessel elsewhere (NVE)</li> <li>• Preretinal or vitreous hemorrhage</li> <li>• Extensive fibrovascular proliferation</li> <li>• Preretinal fibrosis ± tractional retinal detachment</li> </ul>                                                                                                                                   |
| Maculopathy       | M0 | None              | <ul style="list-style-type: none"> <li>• Normal macula</li> </ul>                                                                                                                                                                                                                                                                                                                                                     |
|                   | M1 | Maculopathy       | <ul style="list-style-type: none"> <li>• Exudate within one-disc diameter (DD) of centre of fovea</li> <li>• Circinate or group of exudates within the macula</li> <li>• Retinal thickening less than or equal to one DD of centre of fovea (if stereo available)</li> <li>• Any microaneurysm or haemorrhage within one DD of centre of fovea only if visual acuity (if no stereo) <math>\leq 6/12</math></li> </ul> |
