# Supplementary material for: Saving sight in China and beyond: the Lifeline Express model
Source: PubMed Central journal article supplement — BMJ Glob Health. 2018 Aug 16;3(4):e000766. doi: 10.1136/bmjgh-2018-000766 (PMC6104791; doi:10.1136/bmjgh-2018-000766), 2018-08-16
Supplement: bmjgh-2018-000766supp002.pdf [file bmjgh-2018-000766supp002.pdf]

**Supplementary Table 2.** Throughput of cataract and diabetic retinopathy screening cases of Lifeline Express up to December 2016.

| Diabetic retinopathy cases screened (Apr 2014 to Dec 2016), N = 34,506                                                      | R0/M0  | R1    | R2    | R3    | M1    |
|-----------------------------------------------------------------------------------------------------------------------------|--------|-------|-------|-------|-------|
| Grading                                                                                                                     | 25,110 | 7,252 | 1,069 | 1,075 | 3,460 |
| Percentage of total                                                                                                         | 72.8%  | 21.0% | 3.1%  | 3.1%  | 10.0% |
| Grading of R0/R1/R2/R3/M0/M1 are based on guidelines published previously as denoted in Supplementary Table 1. <sup>1</sup> |        |       |       |       |       |

1. Harding S, Greenwood R, Aldington S, Gibson J, Owens D, Taylor R, et al. Grading and disease management in national screening for diabetic retinopathy in England and Wales. *Diabet Med.* 2003;20(12):965-71.
